# Supplementary material
Source: publisher figshare collection journal article supplement (https://acs.figshare.com/ndownloader/files/8583118)
Supplement: Supplementary file 1 [file 8583118]

 
data_a_a 
 
_audit_creation_method            SHELXL-97 
_chemical_name_systematic 
; 
 ? 
; 
_chemical_name_common             ? 
_chemical_melting_point           ? 
_chemical_formula_moiety          ? 
_chemical_formula_sum 
 'C19 H25 O8' 
_chemical_formula_weight          381.39 
 _chemical_absolute_configuration '.' 
loop_ 
 _atom_type_symbol 
 _atom_type_description 
 _atom_type_scat_dispersion_real 
 _atom_type_scat_dispersion_imag 
 _atom_type_scat_source 
 'C'  'C'   0.0181   0.0091 
 'International Tables Vol C Tables 4.2.6.8 and 6.1.1.4' 
 'H'  'H'   0.0000   0.0000 
 'International Tables Vol C Tables 4.2.6.8 and 6.1.1.4' 
 'O'  'O'   0.0492   0.0322 
 'International Tables Vol C Tables 4.2.6.8 and 6.1.1.4' 
 
_symmetry_cell_setting           'Orthorhombic'
_symmetry_space_group_name_H-M   'P2(1)2(1)2(1)'
 
loop_ 
 _symmetry_equiv_pos_as_xyz 
 'x, y, z' 
 '-x+1/2, -y, z+1/2' 
 '-x, y+1/2, -z+1/2' 
 'x+1/2, -y+1/2, -z' 
 
_cell_length_a                    6.4987(3) 
_cell_length_b                    6.9114(3) 
_cell_length_c                    41.4349(19) 
_cell_angle_alpha                 90.00 
_cell_angle_beta                  90.00 
_cell_angle_gamma                 90.00 
_cell_volume                      1861.05(15) 
_cell_formula_units_Z             4 
_cell_measurement_temperature     100(2) 
_cell_measurement_reflns_used      8013
_cell_measurement_theta_min        4.27
_cell_measurement_theta_max       72.09

_exptl_crystal_description       'PLATE'
_exptl_crystal_colour            'colourless'
_exptl_crystal_size_max           0.52 
_exptl_crystal_size_mid           0.36 
_exptl_crystal_size_min           0.05 
_exptl_crystal_density_meas       ? 
_exptl_crystal_density_diffrn     1.361 
_exptl_crystal_density_method     'not measured' 
_exptl_crystal_F_000              812 
_exptl_absorpt_coefficient_mu     0.893 
_exptl_absorpt_correction_type    multi-scan 
_exptl_absorpt_correction_T_min   0.6532 
_exptl_absorpt_correction_T_max   0.9550 
_exptl_absorpt_process_details    SADABS_Bruker_2014 
 
_exptl_special_details 
; 
 ? 
; 
 
_diffrn_ambient_temperature       100(2) 
_diffrn_radiation_wavelength      1.54178 
_diffrn_radiation_type            CuK\a 
_diffrn_radiation_source          'fine-focus micro tube' 
_diffrn_radiation_monochromator   graphite 
_diffrn_measurement_device_type  'Bruker APEX-II D8 venture'
_diffrn_measurement_method       '\f and \w scans'
_diffrn_detector_area_resol_mean  ? 
_diffrn_standards_number          0 
_diffrn_standards_interval_count  . 
_diffrn_standards_interval_time   . 
_diffrn_standards_decay_%         . 
_diffrn_reflns_number             10173 
_diffrn_reflns_av_R_equivalents   0.0468 
_diffrn_reflns_av_sigmaI/netI     0.0387 
_diffrn_reflns_limit_h_min        -7 
_diffrn_reflns_limit_h_max        6 
_diffrn_reflns_limit_k_min        -7 
_diffrn_reflns_limit_k_max        8 
_diffrn_reflns_limit_l_min        -43 
_diffrn_reflns_limit_l_max        51 
_diffrn_reflns_theta_min          2.13 
_diffrn_reflns_theta_max          72.24 
_reflns_number_total              3519 
_reflns_number_gt                 3395 
_reflns_threshold_expression      >2sigma(I) 
 
_computing_data_collection       'Bruker APEX2'
_computing_cell_refinement       'Bruker SAINT'
_computing_data_reduction        'Bruker SAINT'
_computing_structure_solution    'SHELXS-97 (Sheldrick 2008)'
_computing_structure_refinement  'SHELXL-2014 (Sheldrick 2014)'
_computing_molecular_graphics    'Bruker SHELXTL'
_computing_publication_material  'Bruker SHELXTL'
 
_refine_special_details 
; 
 Refinement of F^2^ against ALL reflections.  The weighted R-factor wR and 
 goodness of fit S are based on F^2^, conventional R-factors R are based 
 on F, with F set to zero for negative F^2^. The threshold expression of 
 F^2^ > 2sigma(F^2^) is used only for calculating R-factors(gt) etc. and is 
 not relevant to the choice of reflections for refinement.  R-factors based 
 on F^2^ are statistically about twice as large as those based on F, and R- 
 factors based on ALL data will be even larger. 
; 
 
_refine_ls_structure_factor_coef  Fsqd  
_refine_ls_matrix_type            full 
_refine_ls_weighting_scheme       calc  
_refine_ls_weighting_details 
 'calc w=1/[\s^2^(Fo^2^)+(0.0682P)^2^+0.6045P] where P=(Fo^2^+2Fc^2^)/3' 
_atom_sites_solution_primary      direct 
_atom_sites_solution_secondary    difmap 
_atom_sites_solution_hydrogens    geom 
_refine_ls_hydrogen_treatment     mixed 
_refine_ls_extinction_method      none 
_refine_ls_extinction_coef        ? 
_refine_ls_abs_structure_details 
 'Flack H D (1983), Acta Cryst. A39, 876-881' 
_refine_ls_abs_structure_Flack    0.00(17) 
_refine_ls_number_reflns          3519 
_refine_ls_number_parameters      265 
_refine_ls_number_restraints      0 
_refine_ls_R_factor_all           0.0427 
_refine_ls_R_factor_gt            0.0408 
_refine_ls_wR_factor_ref          0.1102 
_refine_ls_wR_factor_gt           0.1091 
_refine_ls_goodness_of_fit_ref    1.046 
_refine_ls_restrained_S_all       1.046 
_refine_ls_shift/su_max           0.000 
_refine_ls_shift/su_mean          0.000 
 
loop_ 
 _atom_site_label 
 _atom_site_type_symbol 
 _atom_site_fract_x 
 _atom_site_fract_y 
 _atom_site_fract_z 
 _atom_site_U_iso_or_equiv 
 _atom_site_adp_type 
 _atom_site_occupancy 
 _atom_site_symmetry_multiplicity 
 _atom_site_calc_flag 
 _atom_site_refinement_flags 
 _atom_site_disorder_assembly 
 _atom_site_disorder_group 
O1 O 0.6120(3) 0.7702(3) 0.22020(4) 0.0415(5) Uani 1 1 d . . . 
O2 O 0.8875(3) 0.6138(2) 0.31618(3) 0.0288(3) Uani 1 1 d . . . 
O3 O 1.1296(2) 0.6755(2) 0.35223(4) 0.0260(3) Uani 1 1 d . . . 
O4 O 1.1195(2) 0.8753(2) 0.44594(3) 0.0208(3) Uani 1 1 d . . . 
O5 O 0.7805(2) 0.98268(18) 0.44160(3) 0.0187(3) Uani 1 1 d . . . 
O6 O 0.9245(2) 0.5640(2) 0.46824(3) 0.0205(3) Uani 1 1 d . . . 
O7 O 0.5010(2) 0.4457(2) 0.47144(3) 0.0204(3) Uani 1 1 d . . . 
C1 C 0.7967(4) 0.8566(3) 0.22561(6) 0.0365(6) Uani 1 1 d . . . 
H1A H 0.8756 0.9208 0.2096 0.044 Uiso 1 1 calc R . . 
C2 C 0.8528(3) 0.8392(3) 0.25660(6) 0.0310(5) Uani 1 1 d . . . 
H2A H 0.9748 0.8879 0.2663 0.037 Uiso 1 1 calc R . . 
C3 C 0.6919(4) 0.7322(3) 0.27227(5) 0.0254(4) Uani 1 1 d . . . 
C4 C 0.5523(4) 0.6941(4) 0.24915(5) 0.0355(5) Uani 1 1 d . . . 
H4A H 0.4287 0.6236 0.2525 0.043 Uiso 1 1 calc R . . 
C5 C 0.6817(3) 0.6780(3) 0.30701(5) 0.0233(4) Uani 1 1 d . . . 
H5A H 0.5818 0.5694 0.3099 0.028 Uiso 1 1 calc R . . 
C6 C 0.6294(3) 0.8420(3) 0.33049(5) 0.0211(4) Uani 1 1 d . . . 
H6A H 0.4889 0.8252 0.3393 0.025 Uiso 1 1 calc R . . 
H6B H 0.6372 0.9689 0.3195 0.025 Uiso 1 1 calc R . . 
C7 C 0.7906(3) 0.8302(3) 0.35777(4) 0.0167(4) Uani 1 1 d . . . 
C8 C 0.9575(3) 0.7040(3) 0.34295(5) 0.0206(4) Uani 1 1 d . . . 
C9 C 0.8696(3) 1.0337(3) 0.36770(5) 0.0199(4) Uani 1 1 d . . . 
H9A H 0.7468 1.1121 0.3740 0.024 Uiso 1 1 calc R . . 
C10 C 1.0146(3) 1.0290(3) 0.39677(5) 0.0204(4) Uani 1 1 d . . . 
H10A H 1.1382 1.1022 0.3974 0.024 Uiso 1 1 calc R . . 
C11 C 0.9498(3) 0.9014(3) 0.42440(4) 0.0162(4) Uani 1 1 d . . . 
C12 C 0.8685(3) 0.7035(3) 0.41450(4) 0.0149(4) Uani 1 1 d . . . 
H12A H 0.9816 0.6151 0.4074 0.018 Uiso 1 1 calc R . . 
C13 C 0.7032(3) 0.7288(3) 0.38827(4) 0.0143(4) Uani 1 1 d . . . 
H13A H 0.5992 0.8200 0.3975 0.017 Uiso 1 1 calc R . . 
C14 C 0.5903(3) 0.5369(3) 0.38329(4) 0.0175(4) Uani 1 1 d . . . 
H14A H 0.4924 0.5484 0.3651 0.021 Uiso 1 1 calc R . . 
H14B H 0.6902 0.4333 0.3781 0.021 Uiso 1 1 calc R . . 
C15 C 0.4743(3) 0.4871(3) 0.41430(4) 0.0189(4) Uani 1 1 d . . . 
H15A H 0.3725 0.5899 0.4190 0.023 Uiso 1 1 calc R . . 
H15B H 0.3986 0.3641 0.4113 0.023 Uiso 1 1 calc R . . 
C16 C 0.6209(3) 0.4673(3) 0.44264(4) 0.0164(4) Uani 1 1 d . . . 
H16A H 0.7032 0.3465 0.4395 0.020 Uiso 1 1 calc R . . 
C17 C 0.7701(3) 0.6362(3) 0.44634(4) 0.0152(4) Uani 1 1 d . . . 
C18 C 0.6785(3) 0.8275(3) 0.45898(5) 0.0191(4) Uani 1 1 d . . . 
H18A H 0.5283 0.8314 0.4550 0.023 Uiso 1 1 calc R . . 
H18B H 0.7030 0.8402 0.4825 0.023 Uiso 1 1 calc R . . 
C19 C 0.9775(4) 1.1418(3) 0.34027(5) 0.0300(5) Uani 1 1 d . . . 
H19A H 1.0278 1.2668 0.3482 0.045 Uiso 1 1 calc R . . 
H19B H 0.8801 1.1633 0.3226 0.045 Uiso 1 1 calc R . . 
H19C H 1.0938 1.0647 0.3324 0.045 Uiso 1 1 calc R . . 
O1W O 0.1597(2) 0.2271(2) 0.47467(3) 0.0195(3) Uani 1 1 d . . . 
H2OW H 0.071(5) 0.315(4) 0.4718(6) 0.025(6) Uiso 1 1 d . . . 
H1OW H 0.273(6) 0.279(5) 0.4737(7) 0.046(9) Uiso 1 1 d . . . 
H1O6 H 1.015(5) 0.665(5) 0.4679(7) 0.044(8) Uiso 1 1 d . . . 
H1O7 H 0.568(5) 0.402(4) 0.4845(7) 0.031(7) Uiso 1 1 d . . . 
H1O4 H 1.135(5) 0.982(5) 0.4545(7) 0.045(9) Uiso 1 1 d . . . 
 
loop_ 
 _atom_site_aniso_label 
 _atom_site_aniso_U_11 
 _atom_site_aniso_U_22 
 _atom_site_aniso_U_33 
 _atom_site_aniso_U_23 
 _atom_site_aniso_U_13 
 _atom_site_aniso_U_12 
O1 0.0699(13) 0.0334(9) 0.0210(7) 0.0003(6) 0.0036(8) -0.0133(9) 
O2 0.0319(8) 0.0271(8) 0.0272(7) -0.0073(6) -0.0020(6) 0.0094(6) 
O3 0.0159(7) 0.0279(7) 0.0343(8) 0.0017(6) 0.0042(5) 0.0036(6) 
O4 0.0159(6) 0.0181(7) 0.0283(7) -0.0024(6) -0.0048(5) -0.0031(5) 
O5 0.0201(7) 0.0125(6) 0.0235(6) -0.0002(5) 0.0032(5) 0.0008(5) 
O6 0.0156(7) 0.0189(7) 0.0269(7) 0.0078(6) -0.0074(5) -0.0026(5) 
O7 0.0166(7) 0.0231(7) 0.0215(7) 0.0075(6) -0.0021(5) -0.0040(5) 
C1 0.0497(14) 0.0266(11) 0.0333(11) 0.0017(10) 0.0212(11) 0.0023(10) 
C2 0.0286(11) 0.0278(11) 0.0367(12) 0.0021(9) 0.0108(9) 0.0026(9) 
C3 0.0328(11) 0.0206(9) 0.0228(9) -0.0011(8) 0.0034(8) -0.0024(8) 
C4 0.0491(14) 0.0349(12) 0.0226(10) 0.0031(9) -0.0002(10) -0.0168(11) 
C5 0.0252(10) 0.0218(10) 0.0230(9) 0.0032(8) -0.0004(8) -0.0005(8) 
C6 0.0207(9) 0.0225(9) 0.0201(9) 0.0040(8) 0.0003(7) 0.0036(8) 
C7 0.0158(8) 0.0138(8) 0.0203(9) 0.0014(7) 0.0013(7) 0.0023(7) 
C8 0.0217(10) 0.0164(9) 0.0236(9) 0.0008(8) 0.0052(7) 0.0006(7) 
C9 0.0217(9) 0.0128(8) 0.0251(9) 0.0036(7) 0.0041(7) -0.0005(7) 
C10 0.0204(9) 0.0145(9) 0.0264(9) 0.0016(8) 0.0021(7) -0.0059(7) 
C11 0.0131(8) 0.0139(8) 0.0215(8) 0.0002(7) 0.0009(7) -0.0008(7) 
C12 0.0118(8) 0.0106(8) 0.0224(9) 0.0006(7) -0.0001(6) -0.0008(6) 
C13 0.0136(8) 0.0121(8) 0.0173(8) 0.0003(7) 0.0012(7) 0.0011(6) 
C14 0.0157(8) 0.0158(8) 0.0209(8) -0.0001(7) -0.0025(7) -0.0014(7) 
C15 0.0146(8) 0.0200(9) 0.0221(9) 0.0037(7) -0.0022(7) -0.0051(7) 
C16 0.0138(8) 0.0139(8) 0.0215(8) 0.0026(7) -0.0002(7) -0.0004(7) 
C17 0.0127(8) 0.0135(8) 0.0193(8) 0.0028(7) -0.0017(6) -0.0004(6) 
C18 0.0184(9) 0.0157(9) 0.0232(9) 0.0011(7) 0.0024(7) -0.0001(7) 
C19 0.0370(12) 0.0232(10) 0.0298(11) 0.0068(9) 0.0070(9) -0.0060(9) 
O1W 0.0153(7) 0.0178(7) 0.0253(7) 0.0027(5) -0.0015(5) -0.0043(6) 
 
_geom_special_details 
; 
 All esds (except the esd in the dihedral angle between two l.s. planes) 
 are estimated using the full covariance matrix.  The cell esds are taken 
 into account individually in the estimation of esds in distances, angles 
 and torsion angles; correlations between esds in cell parameters are only 
 used when they are defined by crystal symmetry.  An approximate (isotropic) 
 treatment of cell esds is used for estimating esds involving l.s. planes. 
; 
 
loop_ 
 _geom_bond_atom_site_label_1 
 _geom_bond_atom_site_label_2 
 _geom_bond_distance 
 _geom_bond_site_symmetry_2 
 _geom_bond_publ_flag 
O1 C1 1.359(4) . ? 
O1 C4 1.366(3) . ? 
O2 C8 1.351(3) . ? 
O2 C5 1.459(3) . ? 
O3 C8 1.200(3) . ? 
O4 C11 1.430(2) . ? 
O4 H1O4 0.83(4) . ? 
O5 C11 1.426(2) . ? 
O5 C18 1.452(2) . ? 
O6 C17 1.442(2) . ? 
O6 H1O6 0.91(4) . ? 
O7 C16 1.433(2) . ? 
O7 H1O7 0.76(3) . ? 
C1 C2 1.340(4) . ? 
C1 H1A 0.9500 . ? 
C2 C3 1.436(3) . ? 
C2 H2A 0.9500 . ? 
C3 C4 1.345(3) . ? 
C3 C5 1.489(3) . ? 
C4 H4A 0.9500 . ? 
C5 C6 1.532(3) . ? 
C5 H5A 1.0000 . ? 
C6 C7 1.543(3) . ? 
C6 H6A 0.9900 . ? 
C6 H6B 0.9900 . ? 
C7 C8 1.521(3) . ? 
C7 C13 1.552(2) . ? 
C7 C9 1.553(3) . ? 
C9 C10 1.529(3) . ? 
C9 C19 1.530(3) . ? 
C9 H9A 1.0000 . ? 
C10 C11 1.505(3) . ? 
C10 H10A 0.9500 . ? 
C11 C12 1.522(2) . ? 
C12 C13 1.538(2) . ? 
C12 C17 1.538(2) . ? 
C12 H12A 1.0000 . ? 
C13 C14 1.530(2) . ? 
C13 H13A 1.0000 . ? 
C14 C15 1.529(3) . ? 
C14 H14A 0.9900 . ? 
C14 H14B 0.9900 . ? 
C15 C16 1.518(2) . ? 
C15 H15A 0.9900 . ? 
C15 H15B 0.9900 . ? 
C16 C17 1.526(2) . ? 
C16 H16A 1.0000 . ? 
C17 C18 1.542(2) . ? 
C18 H18A 0.9900 . ? 
C18 H18B 0.9900 . ? 
C19 H19A 0.9800 . ? 
C19 H19B 0.9800 . ? 
C19 H19C 0.9800 . ? 
O1W H2OW 0.85(3) . ? 
O1W H1OW 0.82(4) . ? 
 
loop_ 
 _geom_angle_atom_site_label_1 
 _geom_angle_atom_site_label_2 
 _geom_angle_atom_site_label_3 
 _geom_angle 
 _geom_angle_site_symmetry_1 
 _geom_angle_site_symmetry_3 
 _geom_angle_publ_flag 
C1 O1 C4 105.96(19) . . ? 
C8 O2 C5 112.45(15) . . ? 
C11 O4 H1O4 104(2) . . ? 
C11 O5 C18 108.00(13) . . ? 
C17 O6 H1O6 100(2) . . ? 
C16 O7 H1O7 109(2) . . ? 
C2 C1 O1 111.0(2) . . ? 
C2 C1 H1A 124.5 . . ? 
O1 C1 H1A 124.5 . . ? 
C1 C2 C3 106.3(2) . . ? 
C1 C2 H2A 126.8 . . ? 
C3 C2 H2A 126.8 . . ? 
C4 C3 C2 105.66(19) . . ? 
C4 C3 C5 127.5(2) . . ? 
C2 C3 C5 126.8(2) . . ? 
C3 C4 O1 111.0(2) . . ? 
C3 C4 H4A 124.5 . . ? 
O1 C4 H4A 124.5 . . ? 
O2 C5 C3 106.72(17) . . ? 
O2 C5 C6 105.24(15) . . ? 
C3 C5 C6 115.94(17) . . ? 
O2 C5 H5A 109.6 . . ? 
C3 C5 H5A 109.6 . . ? 
C6 C5 H5A 109.6 . . ? 
C5 C6 C7 105.98(16) . . ? 
C5 C6 H6A 110.5 . . ? 
C7 C6 H6A 110.5 . . ? 
C5 C6 H6B 110.5 . . ? 
C7 C6 H6B 110.5 . . ? 
H6A C6 H6B 108.7 . . ? 
C8 C7 C6 102.64(15) . . ? 
C8 C7 C13 109.30(15) . . ? 
C6 C7 C13 111.85(15) . . ? 
C8 C7 C9 112.99(16) . . ? 
C6 C7 C9 111.73(15) . . ? 
C13 C7 C9 108.29(14) . . ? 
O3 C8 O2 120.09(18) . . ? 
O3 C8 C7 129.05(19) . . ? 
O2 C8 C7 110.84(17) . . ? 
C10 C9 C19 108.27(16) . . ? 
C10 C9 C7 113.12(15) . . ? 
C19 C9 C7 113.38(16) . . ? 
C10 C9 H9A 107.2 . . ? 
C19 C9 H9A 107.2 . . ? 
C7 C9 H9A 107.2 . . ? 
C11 C10 C9 116.07(15) . . ? 
C11 C10 H10A 122.0 . . ? 
C9 C10 H10A 122.0 . . ? 
O5 C11 O4 109.44(15) . . ? 
O5 C11 C10 111.42(15) . . ? 
O4 C11 C10 109.42(15) . . ? 
O5 C11 C12 102.78(14) . . ? 
O4 C11 C12 108.81(14) . . ? 
C10 C11 C12 114.71(15) . . ? 
C11 C12 C13 109.30(14) . . ? 
C11 C12 C17 100.64(14) . . ? 
C13 C12 C17 110.49(14) . . ? 
C11 C12 H12A 112.0 . . ? 
C13 C12 H12A 112.0 . . ? 
C17 C12 H12A 112.0 . . ? 
C14 C13 C12 109.37(14) . . ? 
C14 C13 C7 117.19(15) . . ? 
C12 C13 C7 111.78(14) . . ? 
C14 C13 H13A 105.9 . . ? 
C12 C13 H13A 105.9 . . ? 
C7 C13 H13A 105.9 . . ? 
C15 C14 C13 108.59(15) . . ? 
C15 C14 H14A 110.0 . . ? 
C13 C14 H14A 110.0 . . ? 
C15 C14 H14B 110.0 . . ? 
C13 C14 H14B 110.0 . . ? 
H14A C14 H14B 108.4 . . ? 
C16 C15 C14 111.14(15) . . ? 
C16 C15 H15A 109.4 . . ? 
C14 C15 H15A 109.4 . . ? 
C16 C15 H15B 109.4 . . ? 
C14 C15 H15B 109.4 . . ? 
H15A C15 H15B 108.0 . . ? 
O7 C16 C15 108.19(14) . . ? 
O7 C16 C17 109.98(15) . . ? 
C15 C16 C17 114.06(15) . . ? 
O7 C16 H16A 108.2 . . ? 
C15 C16 H16A 108.2 . . ? 
C17 C16 H16A 108.2 . . ? 
O6 C17 C16 103.93(14) . . ? 
O6 C17 C12 110.81(14) . . ? 
C16 C17 C12 114.18(15) . . ? 
O6 C17 C18 110.59(14) . . ? 
C16 C17 C18 116.41(15) . . ? 
C12 C17 C18 101.11(14) . . ? 
O5 C18 C17 106.76(14) . . ? 
O5 C18 H18A 110.4 . . ? 
C17 C18 H18A 110.4 . . ? 
O5 C18 H18B 110.4 . . ? 
C17 C18 H18B 110.4 . . ? 
H18A C18 H18B 108.6 . . ? 
C9 C19 H19A 109.5 . . ? 
C9 C19 H19B 109.5 . . ? 
H19A C19 H19B 109.5 . . ? 
C9 C19 H19C 109.5 . . ? 
H19A C19 H19C 109.5 . . ? 
H19B C19 H19C 109.5 . . ? 
H2OW O1W H1OW 107(3) . . ? 
 
loop_ 
 _geom_torsion_atom_site_label_1 
 _geom_torsion_atom_site_label_2 
 _geom_torsion_atom_site_label_3 
 _geom_torsion_atom_site_label_4 
 _geom_torsion 
 _geom_torsion_site_symmetry_1 
 _geom_torsion_site_symmetry_2 
 _geom_torsion_site_symmetry_3 
 _geom_torsion_site_symmetry_4 
 _geom_torsion_publ_flag 
C4 O1 C1 C2 -0.7(3) . . . . ? 
O1 C1 C2 C3 0.3(3) . . . . ? 
C1 C2 C3 C4 0.1(3) . . . . ? 
C1 C2 C3 C5 -179.1(2) . . . . ? 
C2 C3 C4 O1 -0.5(3) . . . . ? 
C5 C3 C4 O1 178.7(2) . . . . ? 
C1 O1 C4 C3 0.7(3) . . . . ? 
C8 O2 C5 C3 128.65(18) . . . . ? 
C8 O2 C5 C6 4.9(2) . . . . ? 
C4 C3 C5 O2 138.4(2) . . . . ? 
C2 C3 C5 O2 -42.5(3) . . . . ? 
C4 C3 C5 C6 -104.7(3) . . . . ? 
C2 C3 C5 C6 74.3(3) . . . . ? 
O2 C5 C6 C7 -13.7(2) . . . . ? 
C3 C5 C6 C7 -131.34(18) . . . . ? 
C5 C6 C7 C8 16.61(19) . . . . ? 
C5 C6 C7 C13 -100.44(17) . . . . ? 
C5 C6 C7 C9 137.97(16) . . . . ? 
C5 O2 C8 O3 -175.15(18) . . . . ? 
C5 O2 C8 C7 6.3(2) . . . . ? 
C6 C7 C8 O3 167.1(2) . . . . ? 
C13 C7 C8 O3 -74.0(3) . . . . ? 
C9 C7 C8 O3 46.6(3) . . . . ? 
C6 C7 C8 O2 -14.4(2) . . . . ? 
C13 C7 C8 O2 104.42(17) . . . . ? 
C9 C7 C8 O2 -134.93(16) . . . . ? 
C8 C7 C9 C10 -70.2(2) . . . . ? 
C6 C7 C9 C10 174.67(15) . . . . ? 
C13 C7 C9 C10 51.0(2) . . . . ? 
C8 C7 C9 C19 53.6(2) . . . . ? 
C6 C7 C9 C19 -61.6(2) . . . . ? 
C13 C7 C9 C19 174.82(17) . . . . ? 
C19 C9 C10 C11 -170.55(17) . . . . ? 
C7 C9 C10 C11 -44.0(2) . . . . ? 
C18 O5 C11 O4 -80.17(17) . . . . ? 
C18 O5 C11 C10 158.68(15) . . . . ? 
C18 O5 C11 C12 35.35(17) . . . . ? 
C9 C10 C11 O5 -72.6(2) . . . . ? 
C9 C10 C11 O4 166.27(15) . . . . ? 
C9 C10 C11 C12 43.7(2) . . . . ? 
O5 C11 C12 C13 70.74(17) . . . . ? 
O4 C11 C12 C13 -173.29(14) . . . . ? 
C10 C11 C12 C13 -50.37(19) . . . . ? 
O5 C11 C12 C17 -45.57(16) . . . . ? 
O4 C11 C12 C17 70.40(16) . . . . ? 
C10 C11 C12 C17 -166.67(15) . . . . ? 
C11 C12 C13 C14 -168.31(14) . . . . ? 
C17 C12 C13 C14 -58.46(18) . . . . ? 
C11 C12 C13 C7 60.22(19) . . . . ? 
C17 C12 C13 C7 170.08(15) . . . . ? 
C8 C7 C13 C14 -64.6(2) . . . . ? 
C6 C7 C13 C14 48.4(2) . . . . ? 
C9 C7 C13 C14 171.95(15) . . . . ? 
C8 C7 C13 C12 62.79(19) . . . . ? 
C6 C7 C13 C12 175.76(14) . . . . ? 
C9 C7 C13 C12 -60.69(19) . . . . ? 
C12 C13 C14 C15 64.81(18) . . . . ? 
C7 C13 C14 C15 -166.67(15) . . . . ? 
C13 C14 C15 C16 -60.0(2) . . . . ? 
C14 C15 C16 O7 172.62(15) . . . . ? 
C14 C15 C16 C17 49.9(2) . . . . ? 
O7 C16 C17 O6 73.17(17) . . . . ? 
C15 C16 C17 O6 -165.09(15) . . . . ? 
O7 C16 C17 C12 -165.99(14) . . . . ? 
C15 C16 C17 C12 -44.3(2) . . . . ? 
O7 C16 C17 C18 -48.7(2) . . . . ? 
C15 C16 C17 C18 73.1(2) . . . . ? 
C11 C12 C17 O6 -79.62(16) . . . . ? 
C13 C12 C17 O6 164.97(14) . . . . ? 
C11 C12 C17 C16 163.45(14) . . . . ? 
C13 C12 C17 C16 48.03(19) . . . . ? 
C11 C12 C17 C18 37.65(15) . . . . ? 
C13 C12 C17 C18 -77.77(16) . . . . ? 
C11 O5 C18 C17 -10.70(19) . . . . ? 
O6 C17 C18 O5 99.55(17) . . . . ? 
C16 C17 C18 O5 -142.18(15) . . . . ? 
C12 C17 C18 O5 -17.87(17) . . . . ? 
 
_diffrn_measured_fraction_theta_max    0.978 
_diffrn_reflns_theta_full              72.24 
_diffrn_measured_fraction_theta_full   0.978 
_refine_diff_density_max    0.506 
_refine_diff_density_min   -0.440 
_refine_diff_density_rms    0.055 
